# Supplementary material
Source: PubMed Central journal article supplement (PMC3282181)

**Supplementary Figure S1.** Titration of wtTIA-RRM123 (70  $\mu\text{M}$ ) into buffer.

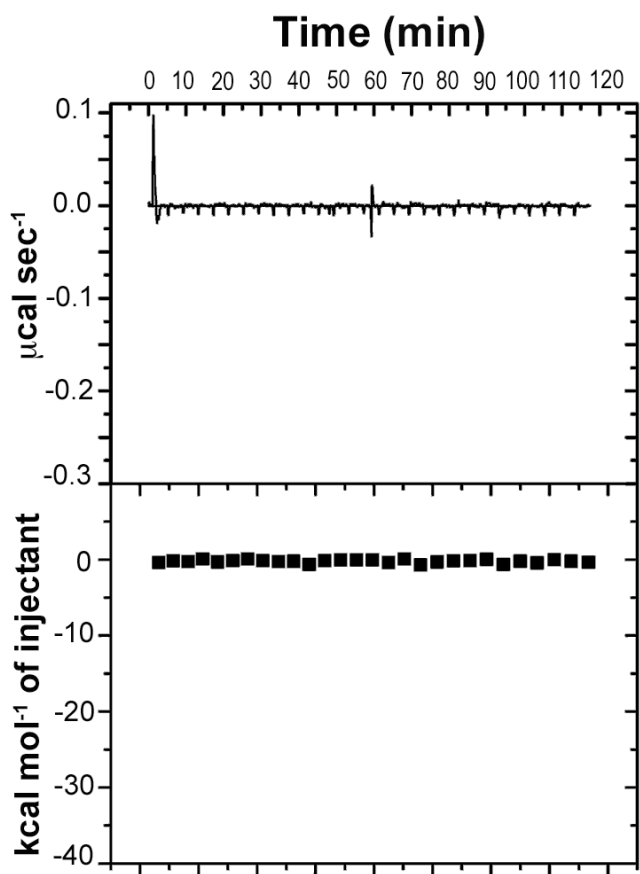

**Supplementary Figure S2.** Qualitative electrophoretic mobility shift assays confirm formation of two complexes during titration of (a) TIA-Mut1 or (b) TIA-RRM23 into fluorescein-labeled U<sub>20</sub> RNA (2.5 μM). The final protein concentrations were 0.3, 0.5, 0.9, 1.4, 2.2, 3.5 and 5.6 μM for TIA-Mut1, or 0.3, 0.5, 0.8, 1.3, 2.0, 3.3, and 5.3 μM for TIA-RRM23.

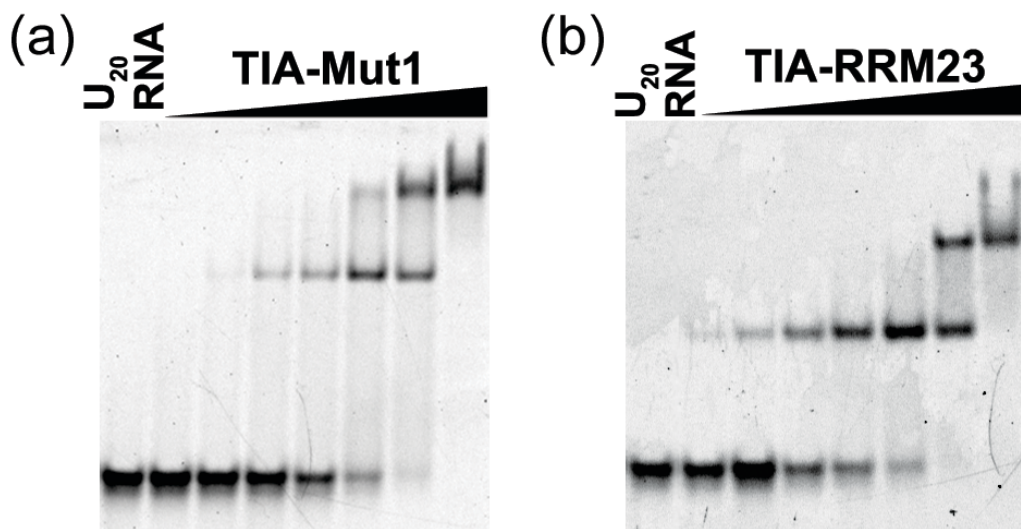

**Supplementary Figure S3.** Qualitative electrophoretic mobility shift assay demonstrating a single complex between wtTIA-RRM123 and the *tnf $\alpha$*  RNA oligonucleotide (5'-UUAUUUAUUUA-3') used for SAXS data collection. The fluorescein-labeled RNA (2.5  $\mu$ M final concentration) was detected by emission at 520 nm. The final protein concentrations were 0.002, 0.005, 0.013, 0.03, 0.07, 0.16, 0.37, 0.86, 2.0, 4.7, 10.9, and 25.3  $\mu$ M.

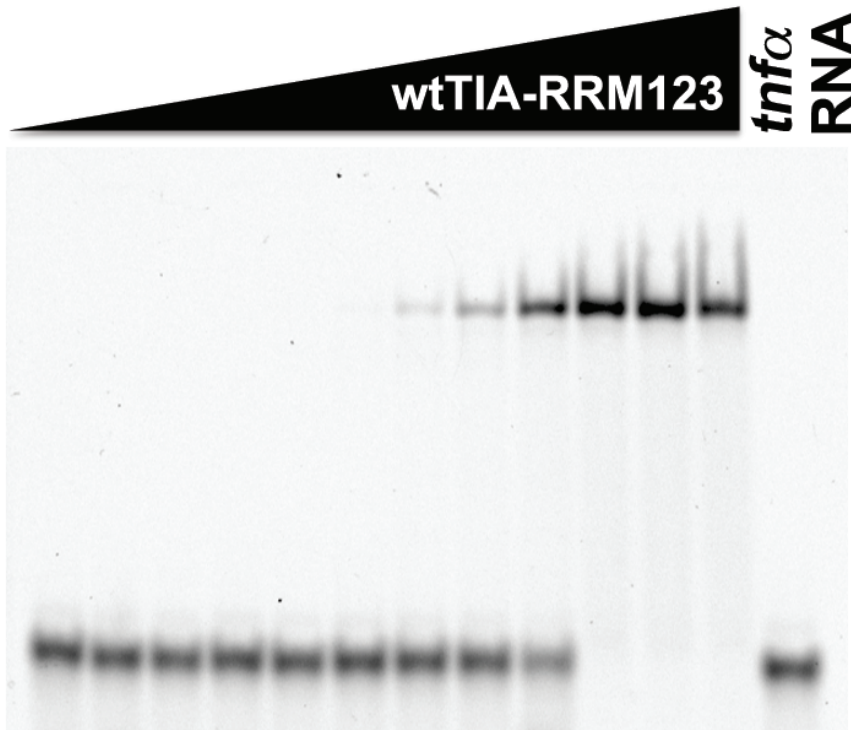

**Supplementary Figure S4.** Guinier plots of (a) wtTIA-RRM123 (Advanced Light Source), (b) wtTIA-RRM123 / *tnf- $\alpha$*  RNA, (c) wtTIA-RRM123 (Cornell High Energy Synchrotron Source), and (d) TIA-Mut1 are linear with  $R_G$  values among the concentration series that match within measurement error.

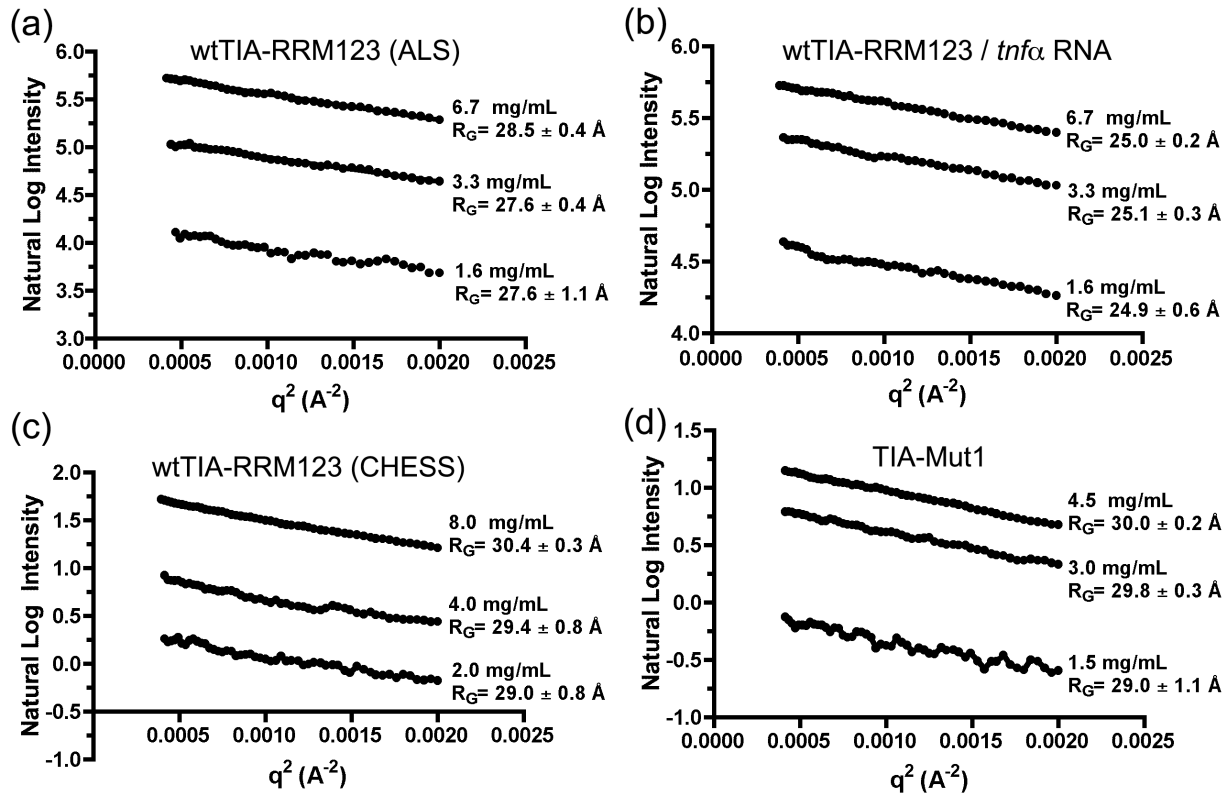

**Supplementary Figure S5.** Kratky plots (a) or pairwise distance distribution functions (b) of wtTIA-RRM123 SAXS data collected either at the Advanced Light Source (ALS) or Cornell High Energy Synchrotron Source (CHESS).

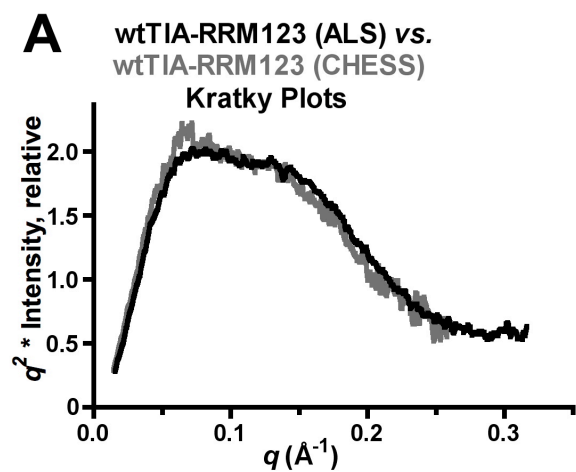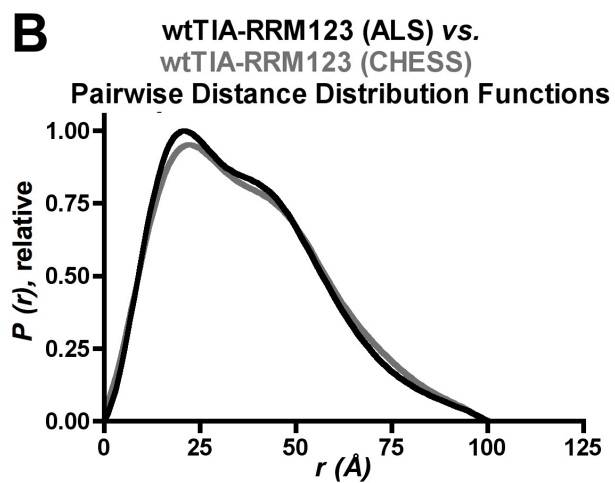

Supplement: NIHMS346207-supplement-01.pdf [file NIHMS346207-supplement-01.pdf]
